# Supplementary material for: Effect of Partial Organic Fertilizer Substitution on Heavy Metal Accumulation in Wheat Grains and Associated Health Risks
Source: MDPI journal article supplement (doi:10.3390/agronomy13122930), 2023-11-28

**Table S1.** Heavy metals concentrations in organic fertilizer and chemical fertilizers.

| Samples            | Concentrations of heavy metals (mg kg <sup>-1</sup> ) |       |      |      |      |       |       |
|--------------------|-------------------------------------------------------|-------|------|------|------|-------|-------|
|                    | Zn                                                    | Cu    | Ni   | Cd   | Pb   | As    | Cr    |
| Organic fertilizer | 284.50                                                | 26.38 | 25.2 | 0.67 | 26.9 | 13.68 | 21.72 |
| Urea               | 0.05                                                  | 0.06  | 0.46 | 0.05 | 0.06 | 0.03  | 0.52  |
| superphosphate     | 0.45                                                  | 0.20  | 21.7 | 0.21 | 12.4 | 15    | 12.1  |
| potassium sulfate  | 0.21                                                  | 0.05  | 0.38 | 0.02 | 0.72 | 0.22  | 1.25  |

### **Figure caption**

**Figure S1.** Effect of organic fertilizer substitution on soil organic matter. Values are means of triplicate samples and are not significantly different at  $P < 0.05$  when followed by the same lowercase letters.

**Figure S1**

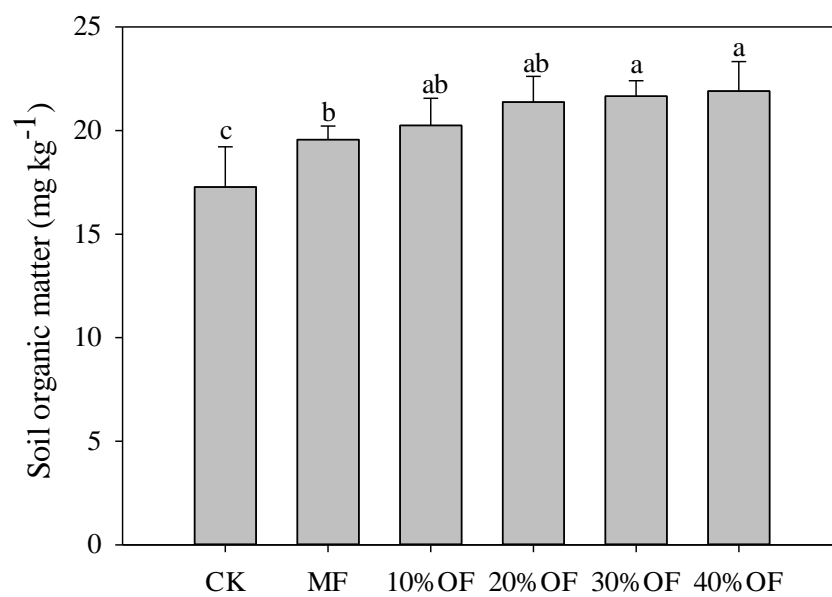

Supplement: s1 [file s1]
